# Supplementary material for: A transcriptomic profile of topping responsive non-coding RNAs in tobacco roots (Nicotiana tabacum)
Source: PubMed Central journal article supplement (PMC6854694; doi:10.1186/s12864-019-6236-6), 2019-11-14
Supplement: 12864_2019_6236_MOESM1_ESM.pdf [file 12864_2019_6236_MOESM1_ESM.pdf]

**A**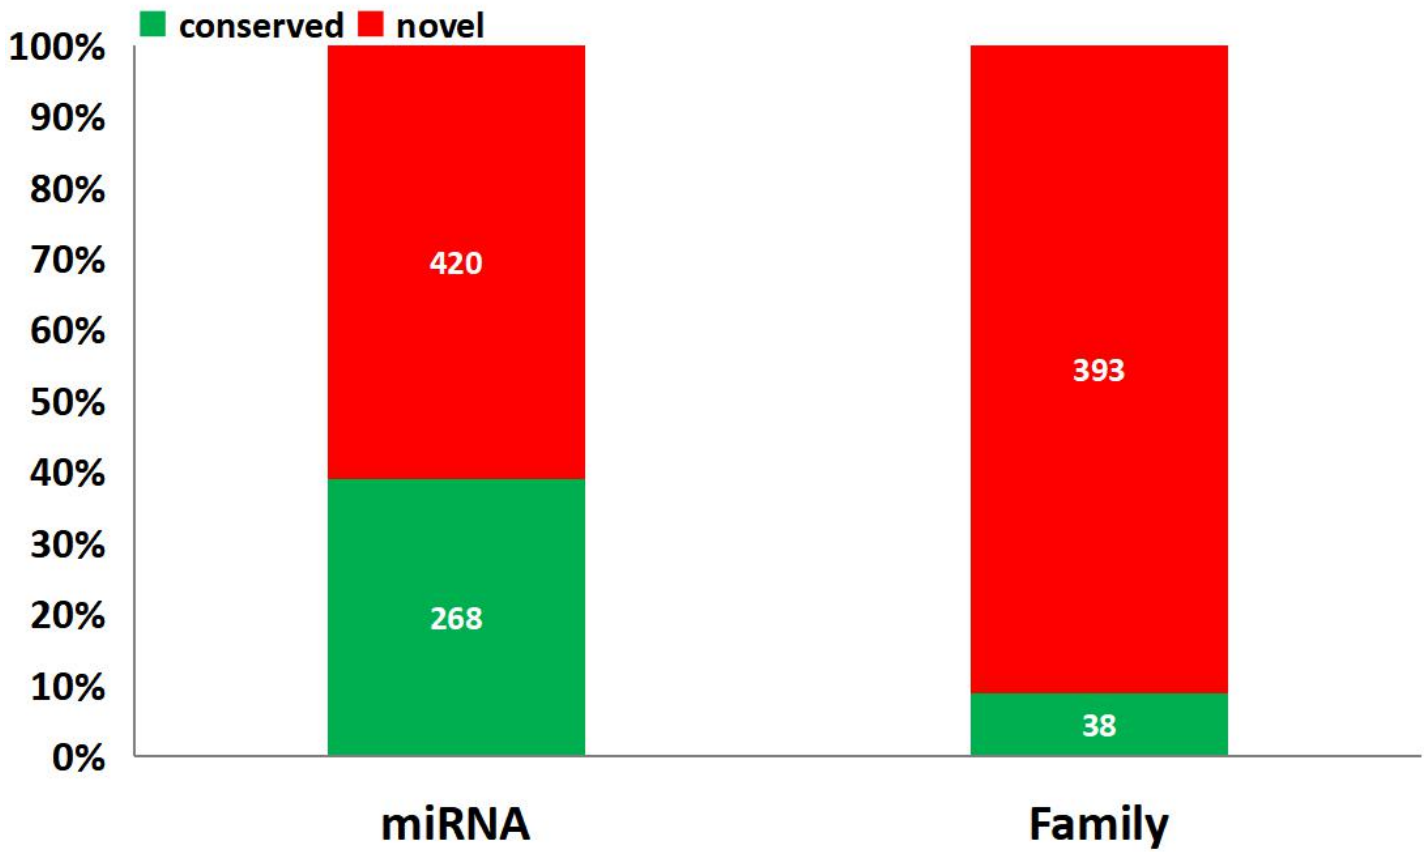**B**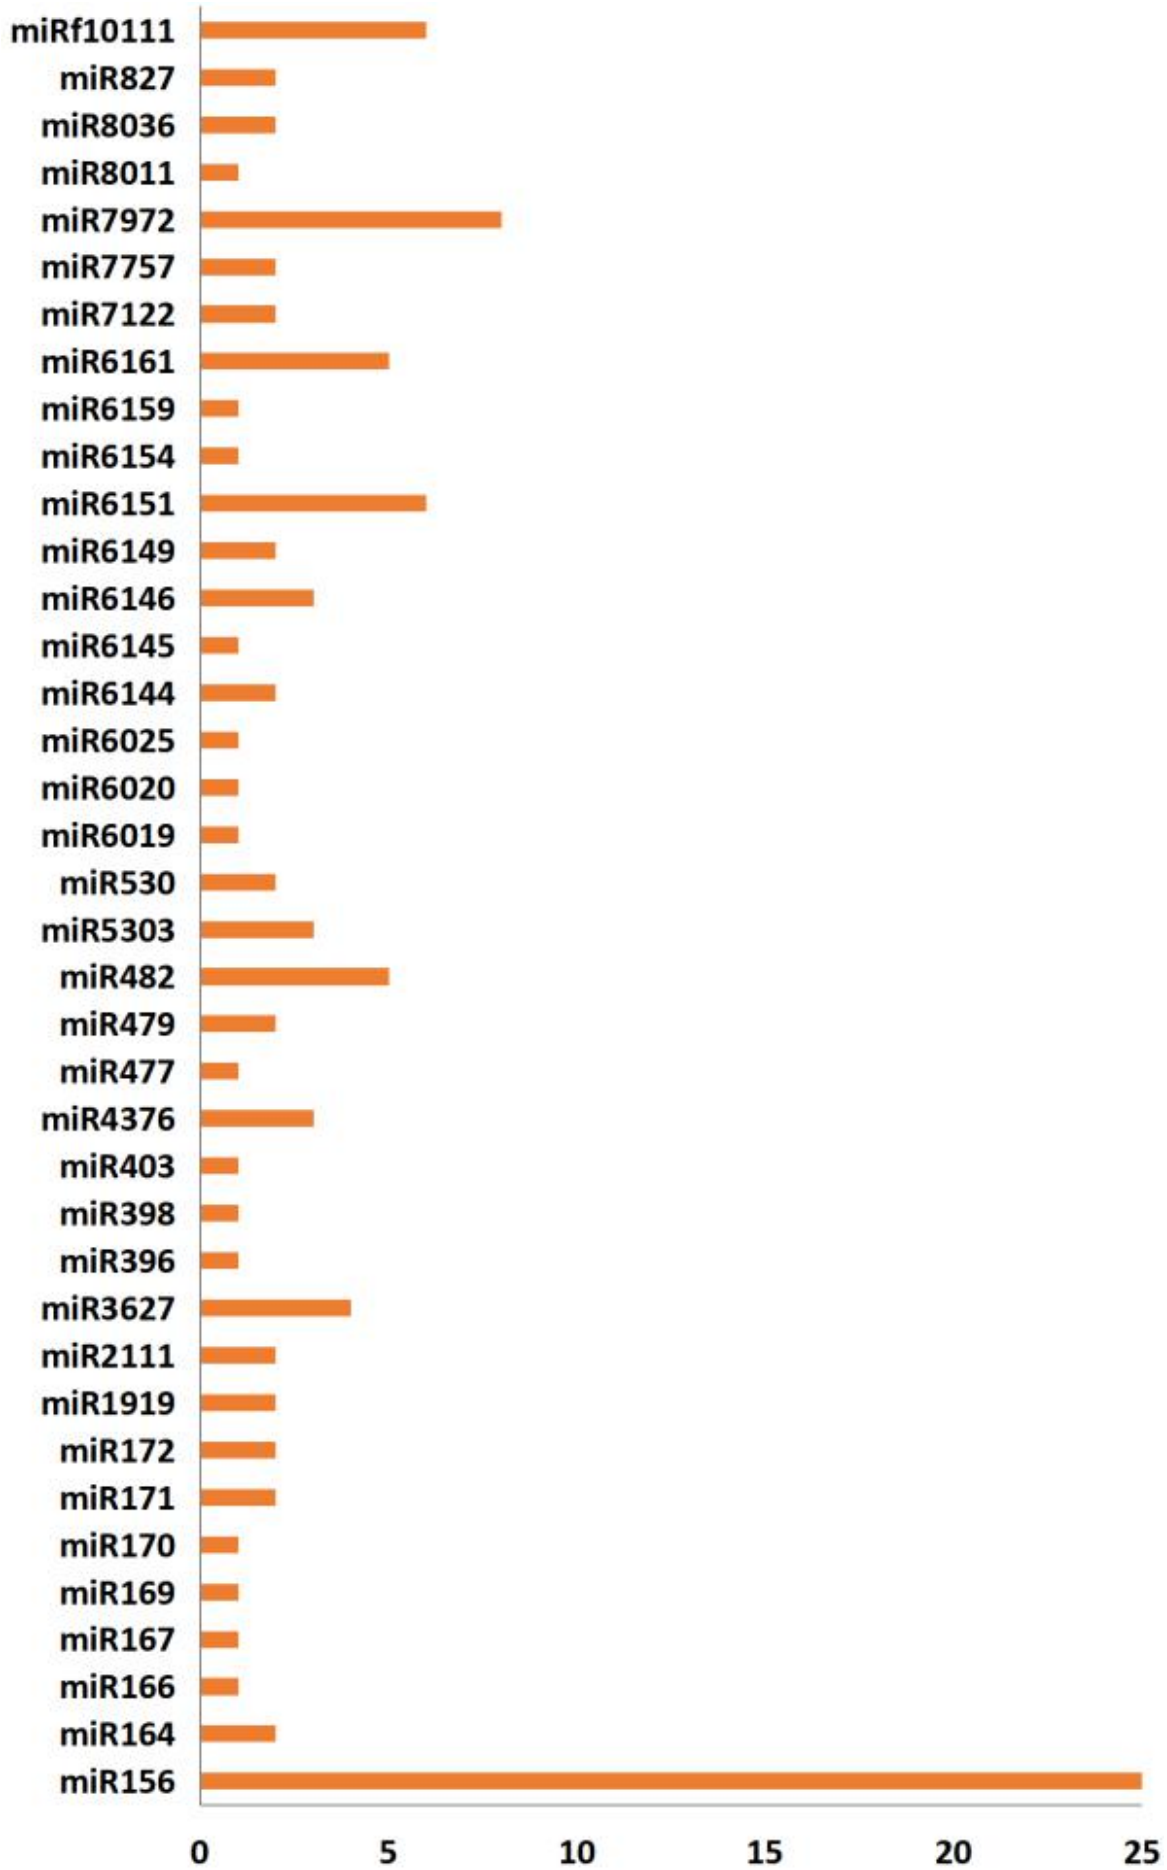

**Fig. S1. Genome-wide identification of miRNAs in tobacco. (A)** Number of conserved and novel miRNAs identified in this study. **(B)** Number of conserved miRNAs in each family.
