# Supplementary material for: A transcriptomic profile of topping responsive non-coding RNAs in tobacco roots (Nicotiana tabacum)
Source: PubMed Central journal article supplement (PMC6854694; doi:10.1186/s12864-019-6236-6), 2019-11-14
Supplement: 12864_2019_6236_MOESM2_ESM.pdf [file 12864_2019_6236_MOESM2_ESM.pdf]

**A**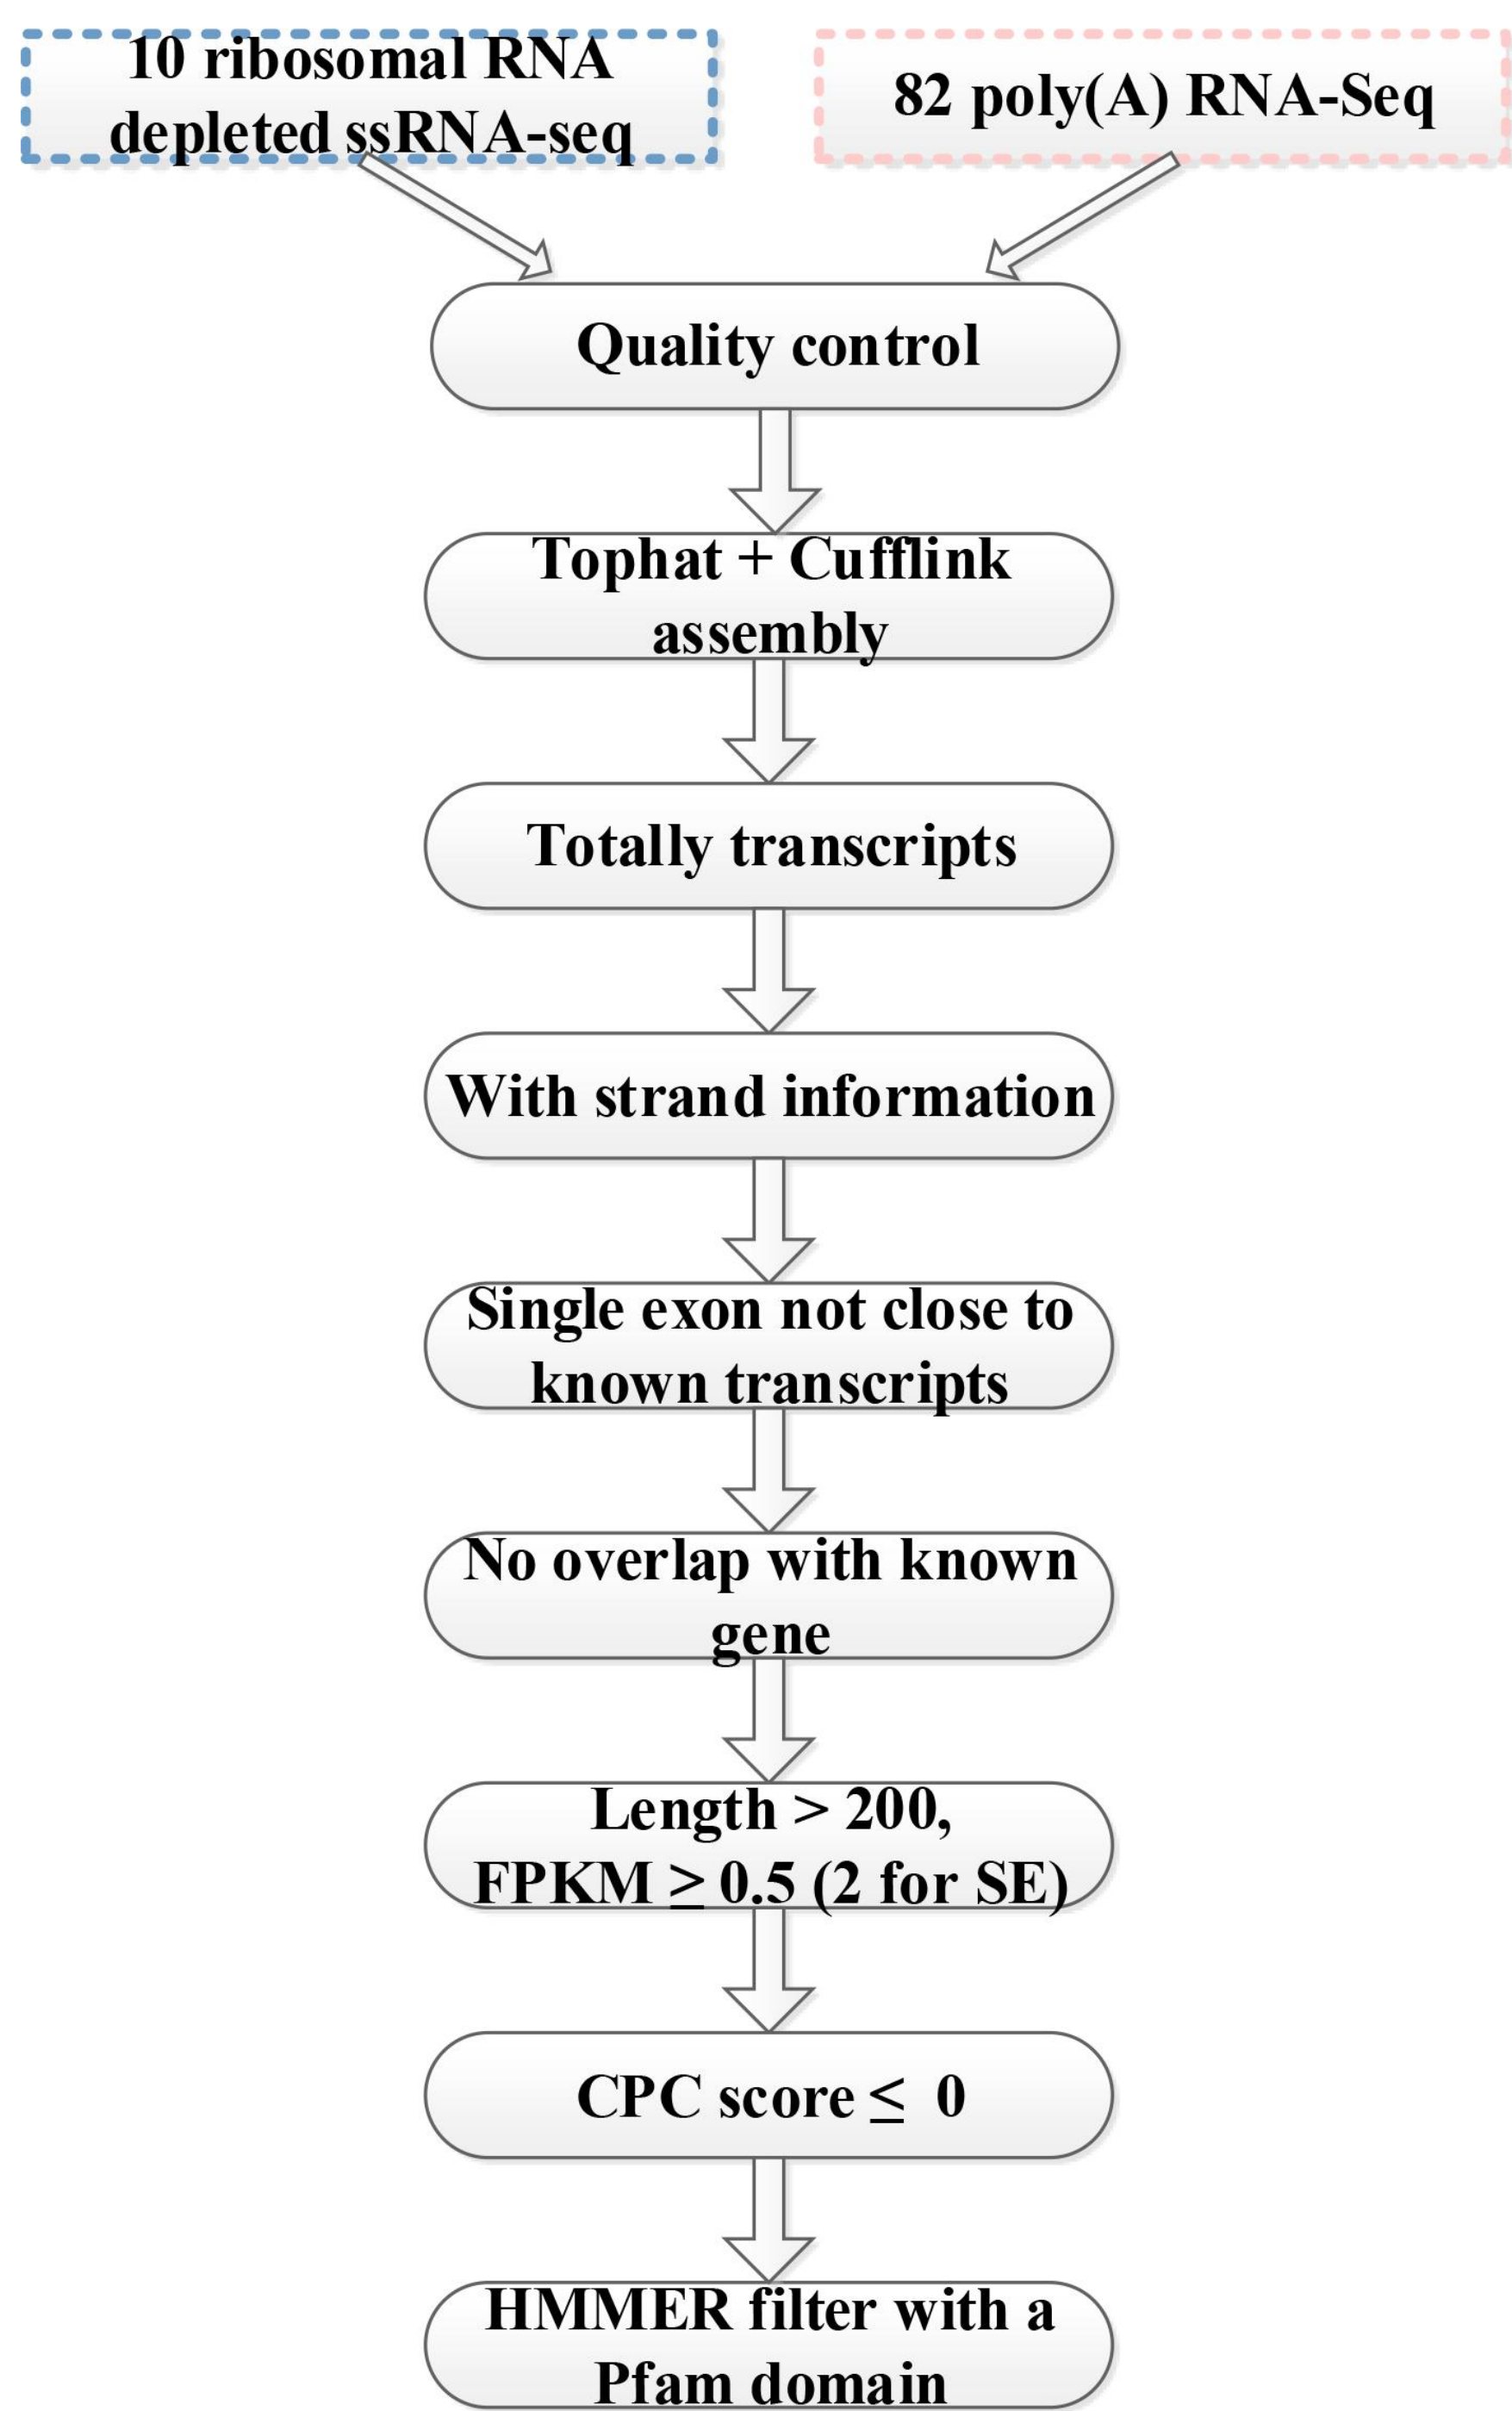**B**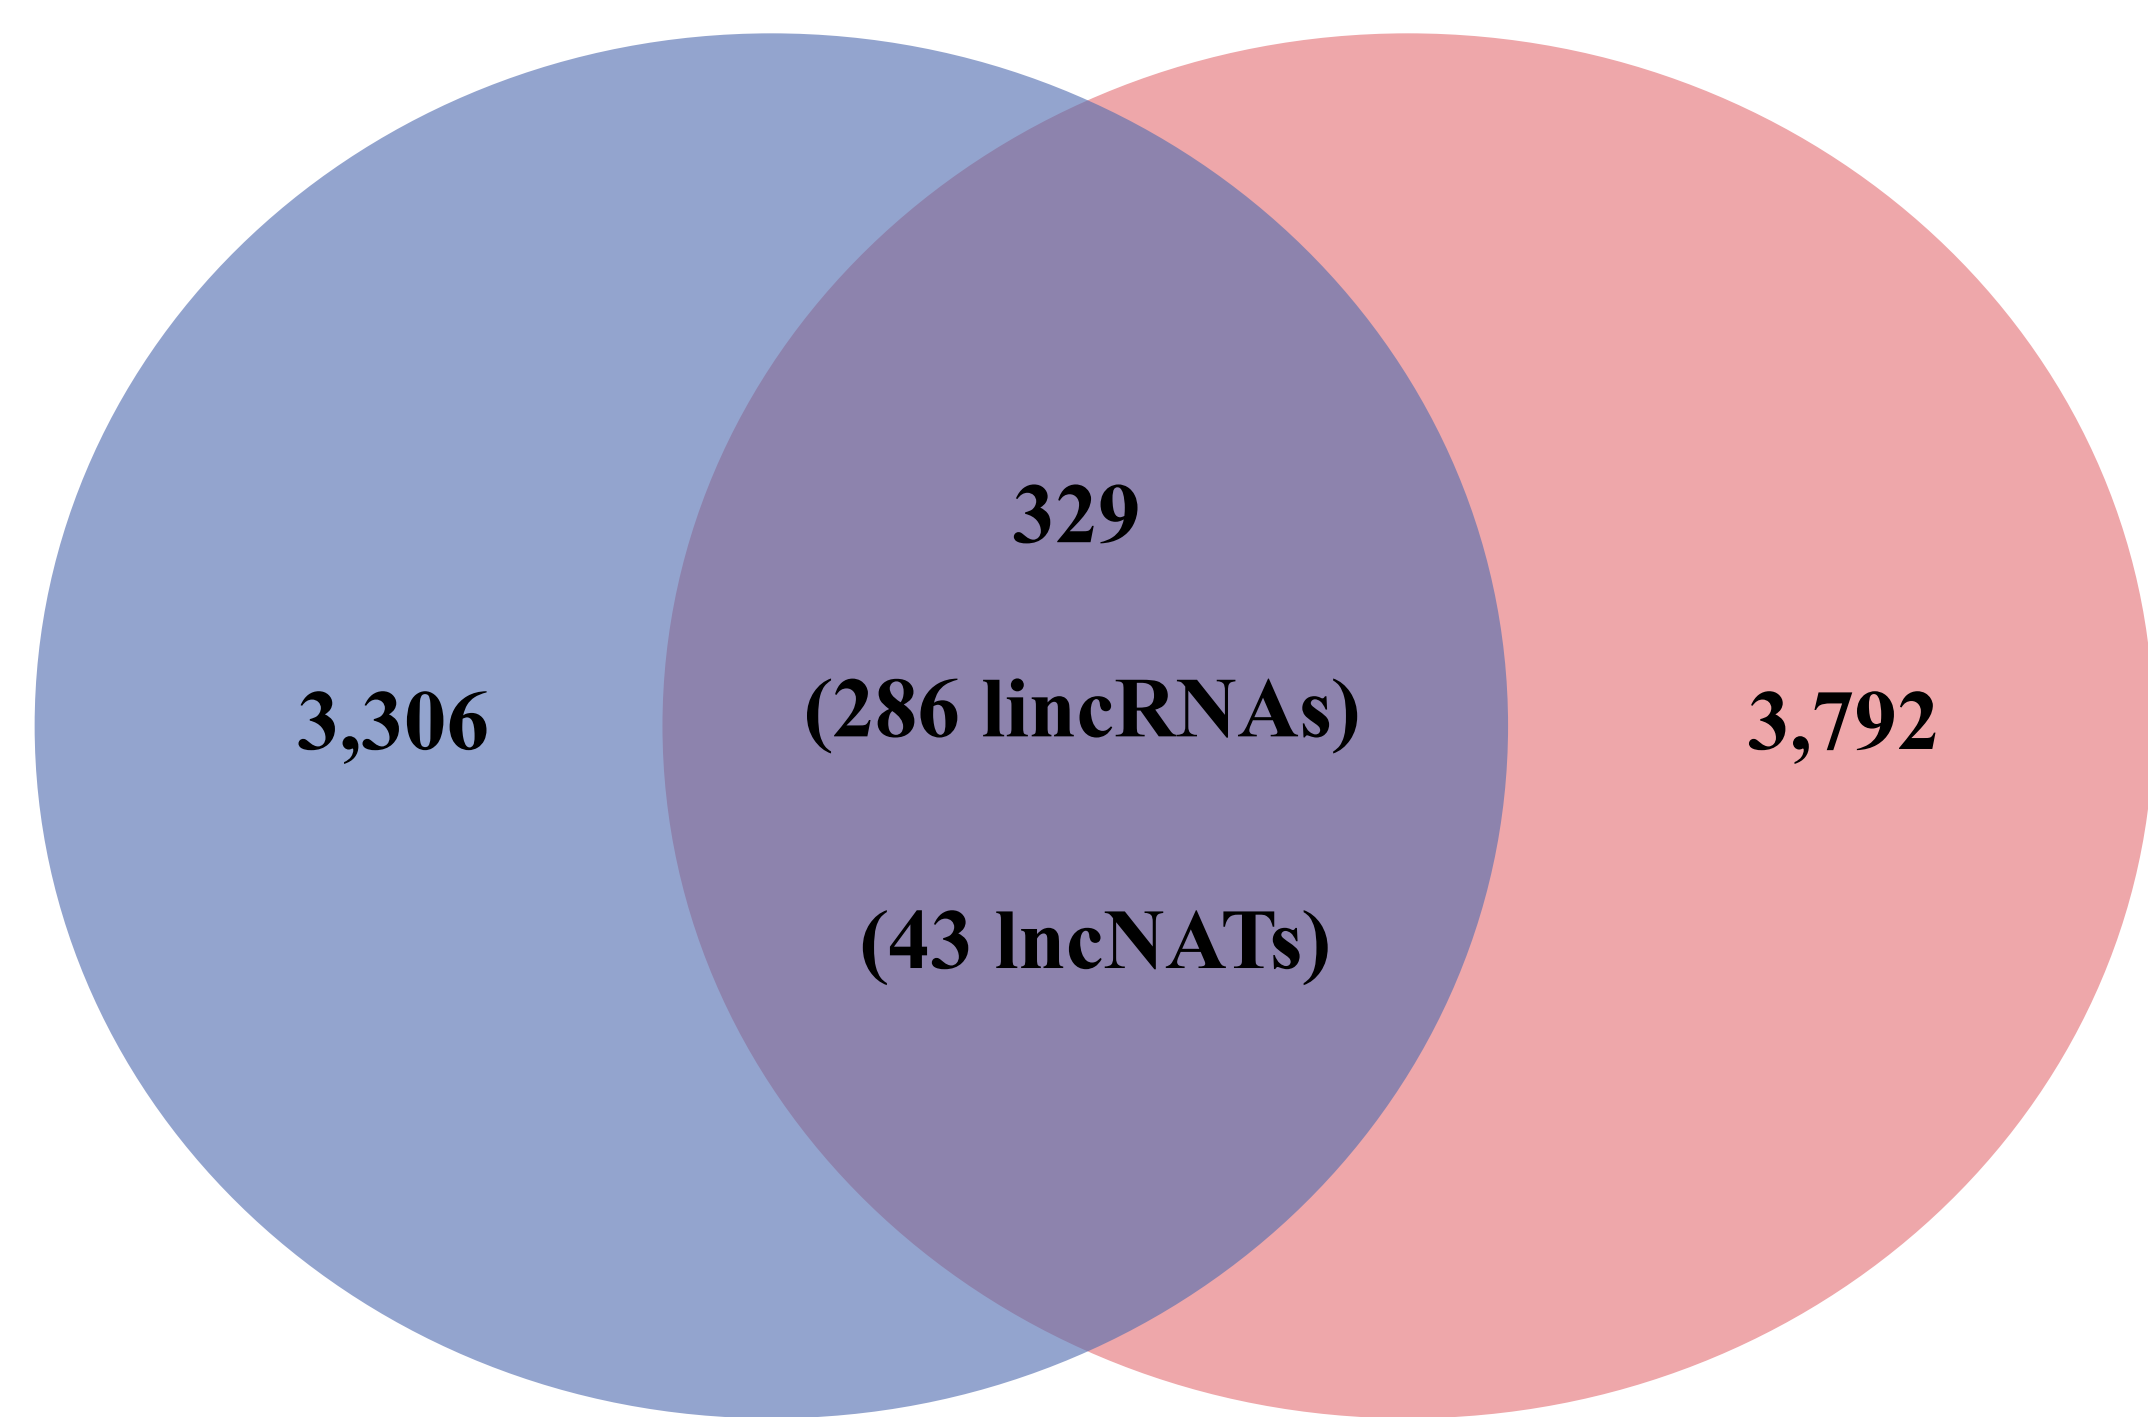**C**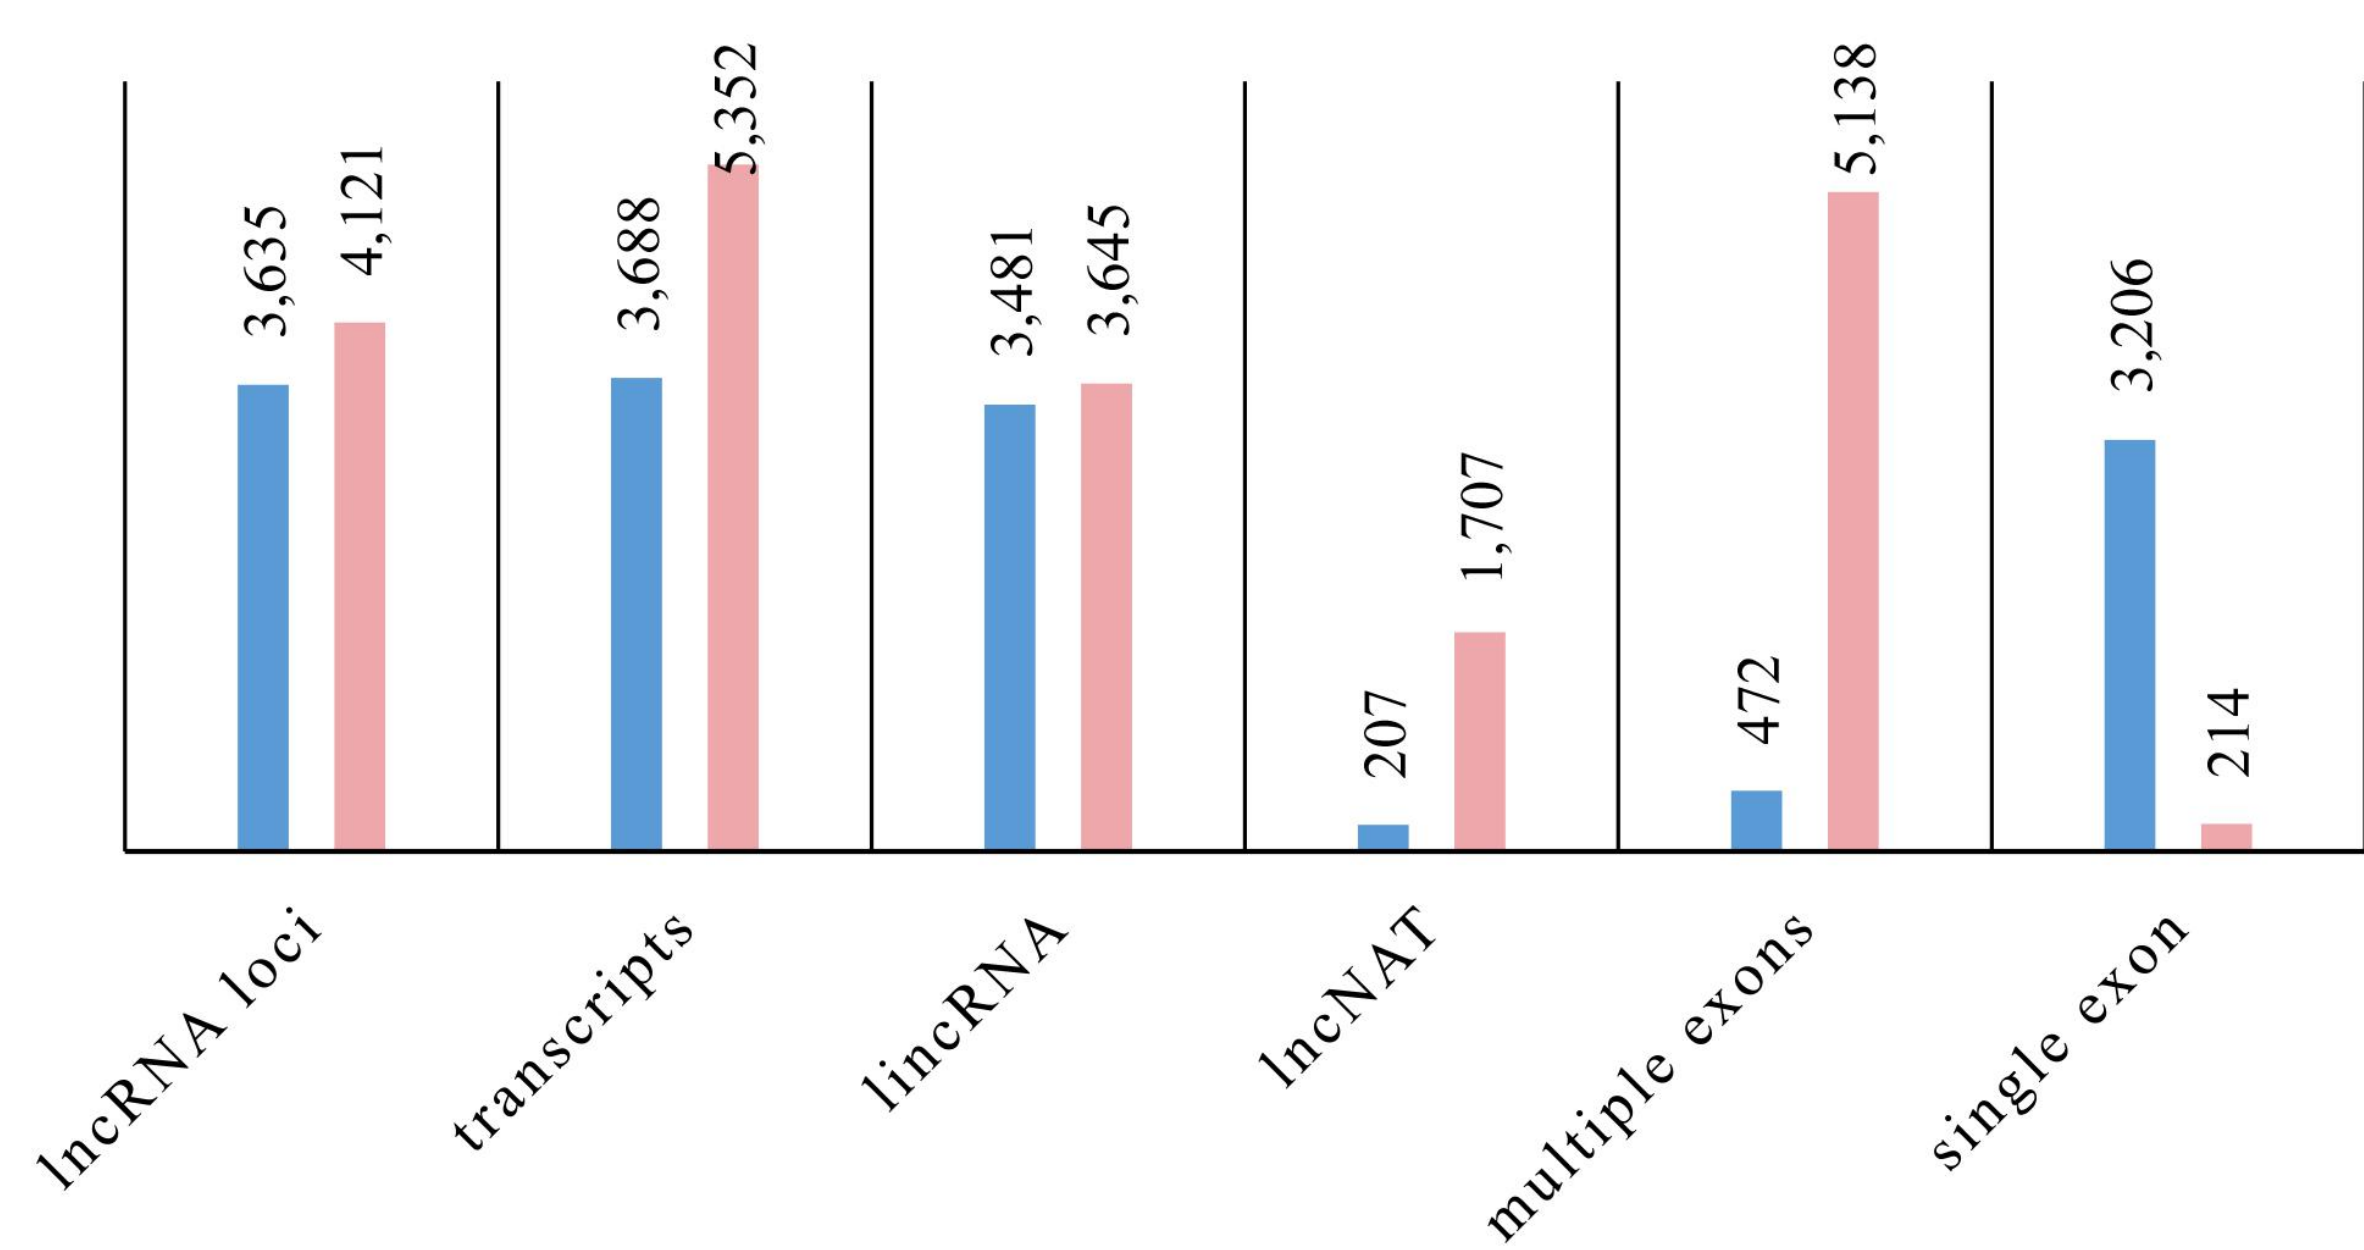**D**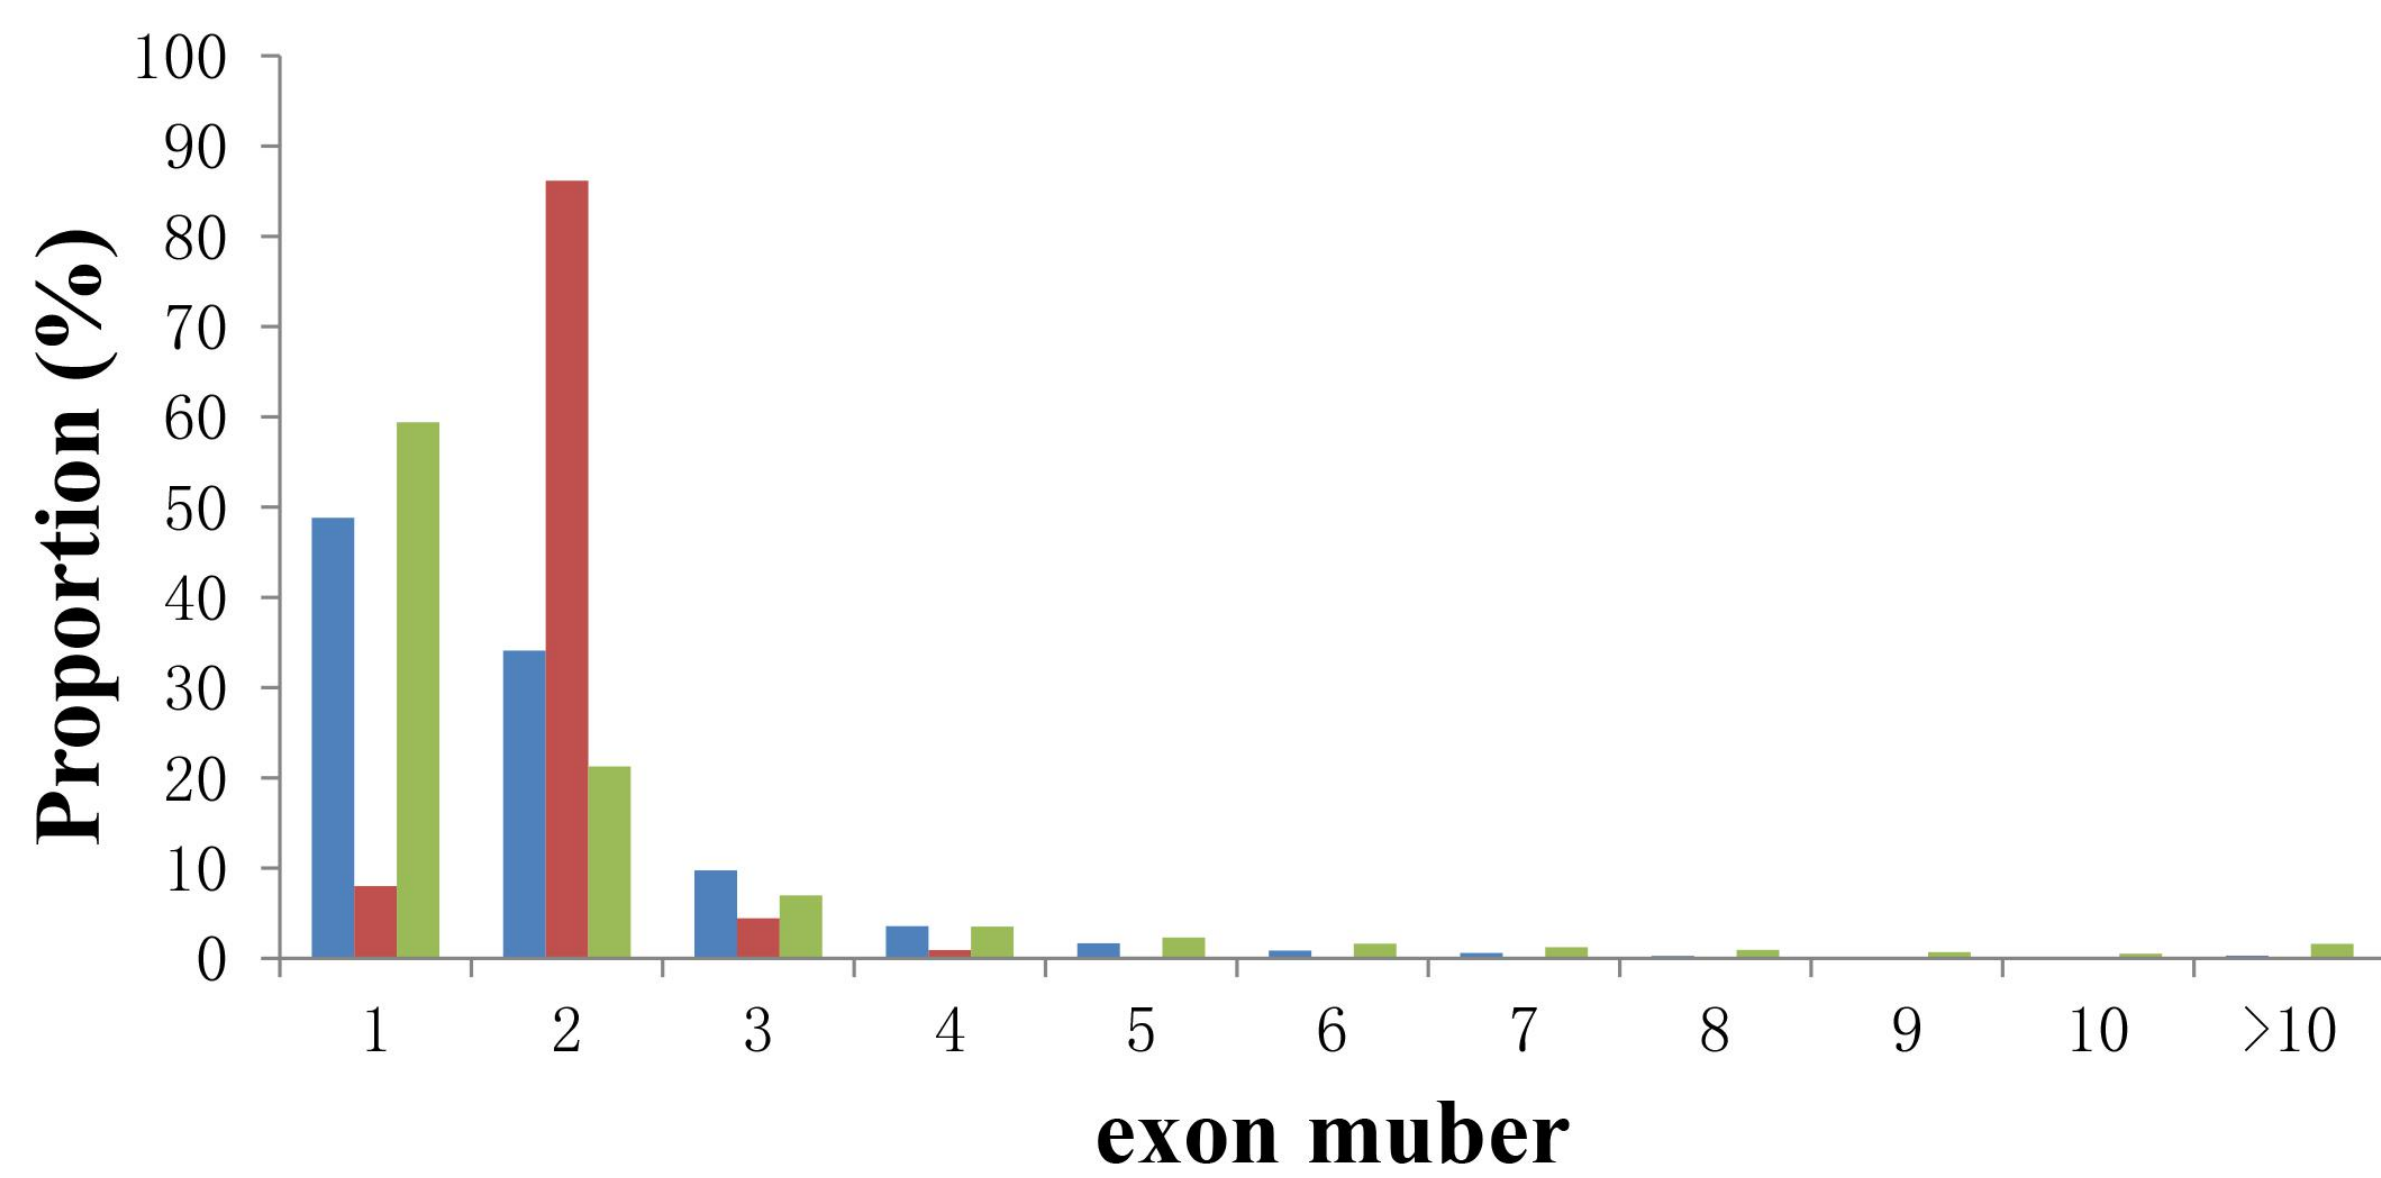**E**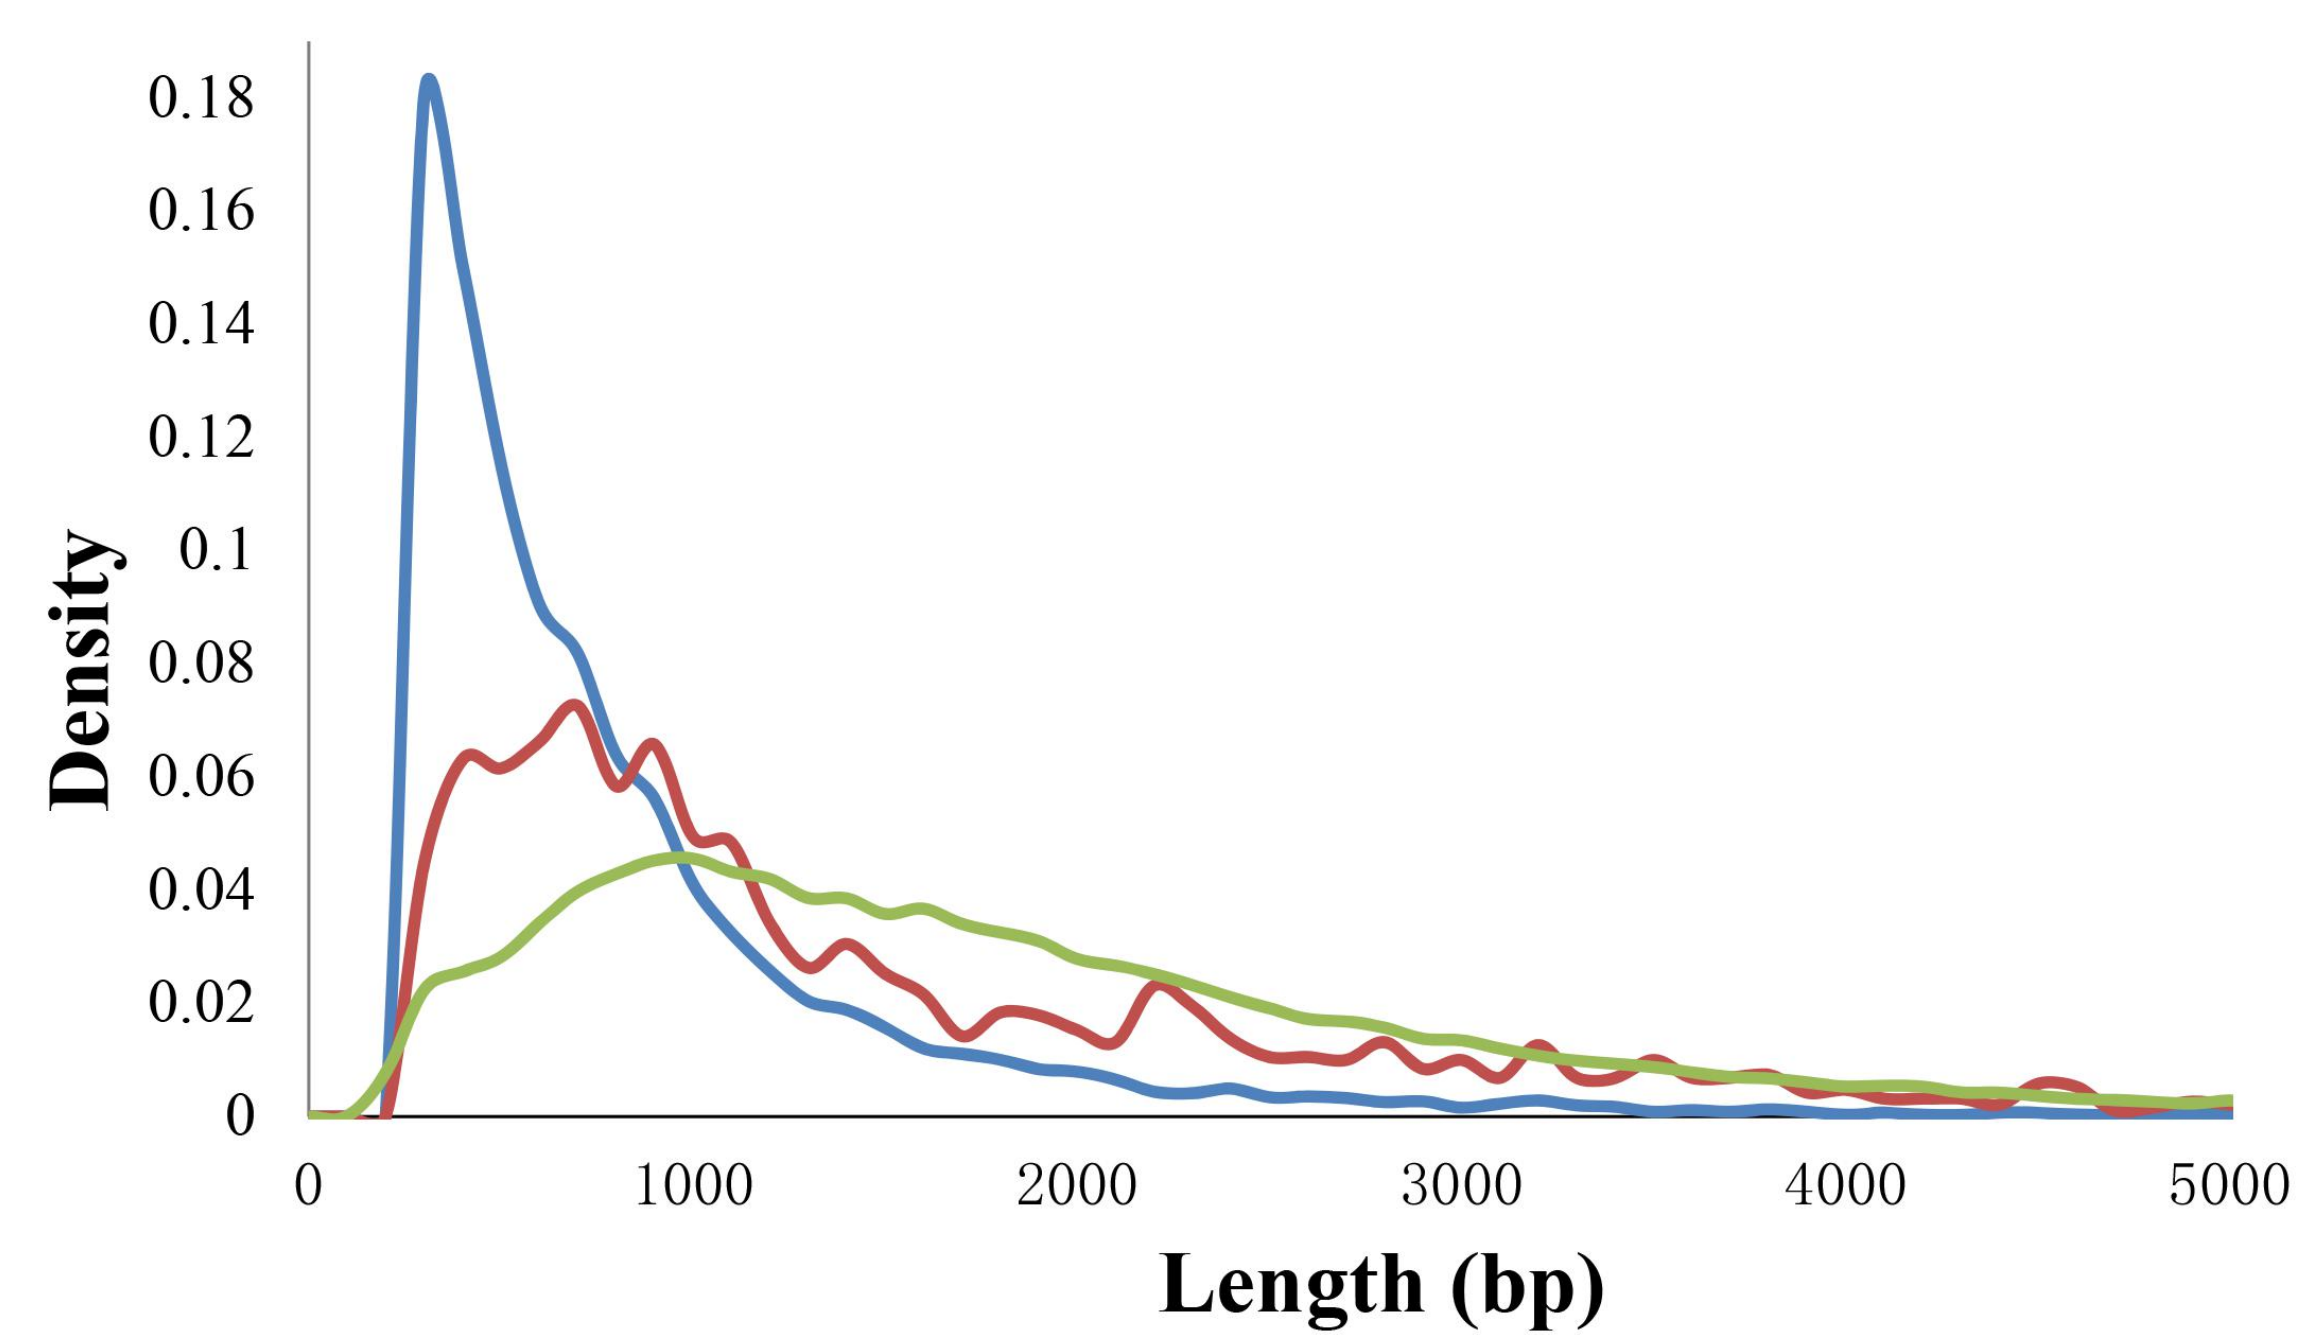**F**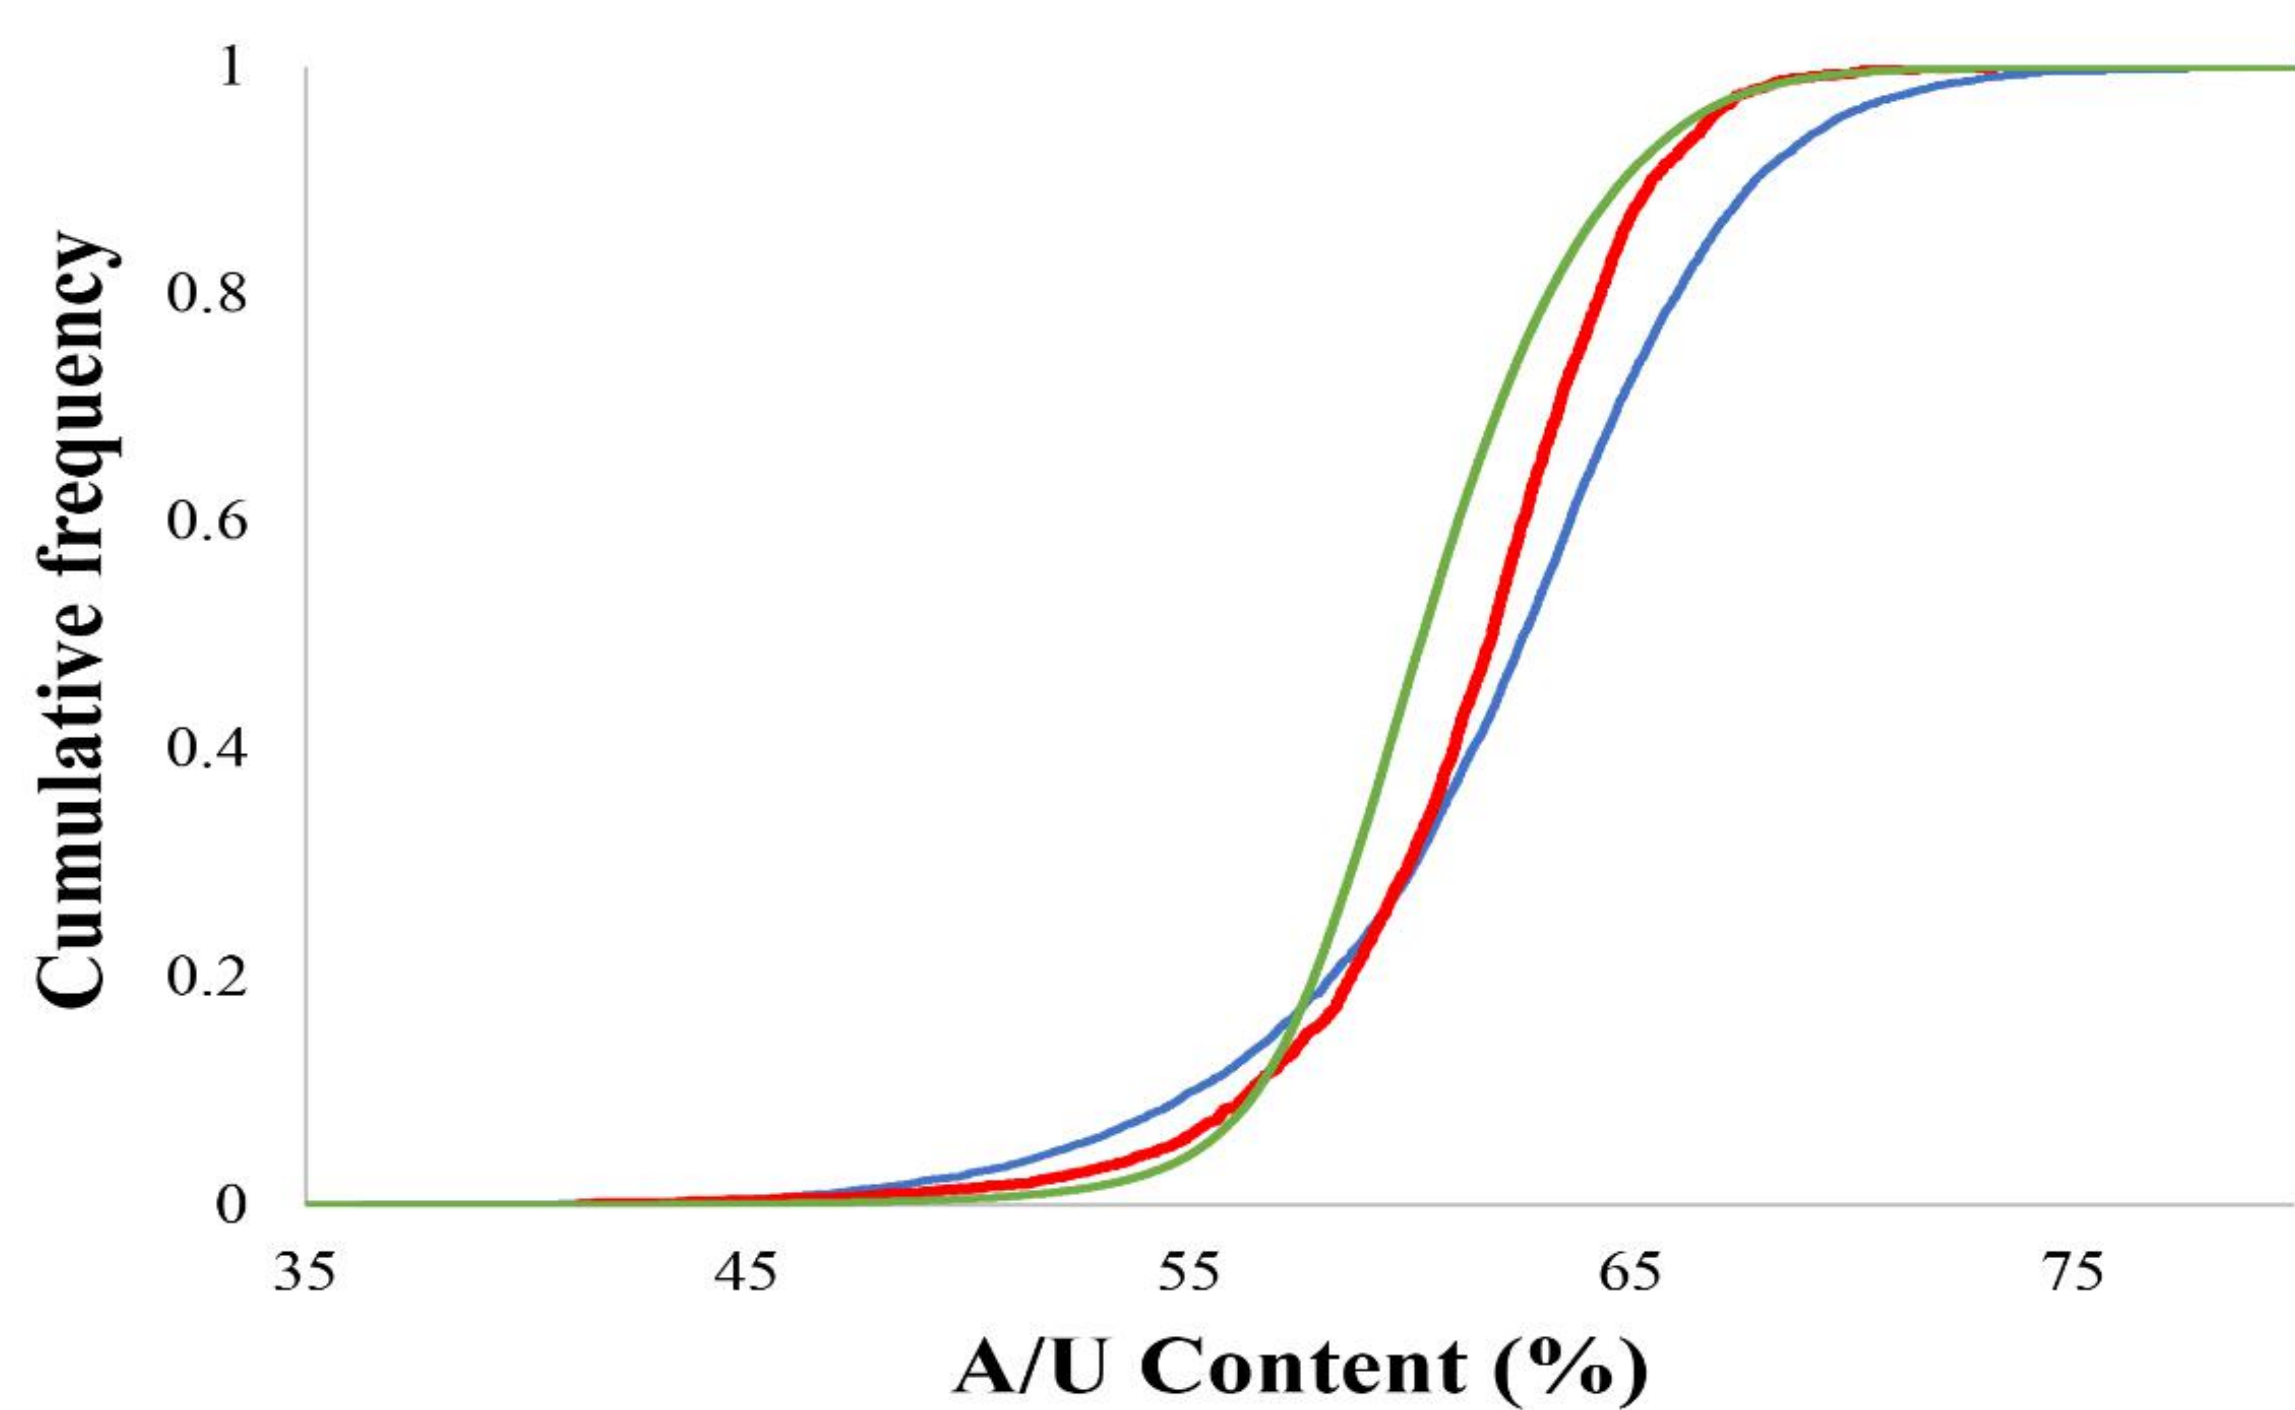

**Fig. S2. Genome-wide identification of lincRNAs in tobacco.** (A) Steps of the pipeline used in identification of lincRNAs from 10 rRNA removed strand specific RNAseq (ssRNA-seq) datasets generated in this study and 82 poly(A) RNA-seq datasets downloaded from NCBI. (B) Comparison of lincRNAs identified in ssRNA-seq and poly(A) RNA-seq datasets. The blue color represents result from the 10 ssRNA-seq datasets; the pink color represents result from the 82 poly(A) RNA-seq datasets. (C) Number of lincRNA loci, transcripts, lincRNA, lncNAT and exons from the two types of RNA-seq datasets. (D) The distribution of lincRNA, lncNAT and mRNA with the exon number showing in the X-axis. (E) The transcript length distribution of lincRNA, lncNAT and mRNA. (F) A/U content of lincRNA, lncNAT and mRNA.
