# Supplementary material for: A transcriptomic profile of topping responsive non-coding RNAs in tobacco roots (Nicotiana tabacum)
Source: PubMed Central journal article supplement (PMC6854694; doi:10.1186/s12864-019-6236-6), 2019-11-14
Supplement: 12864_2019_6236_MOESM3_ESM.pdf [file 12864_2019_6236_MOESM3_ESM.pdf]

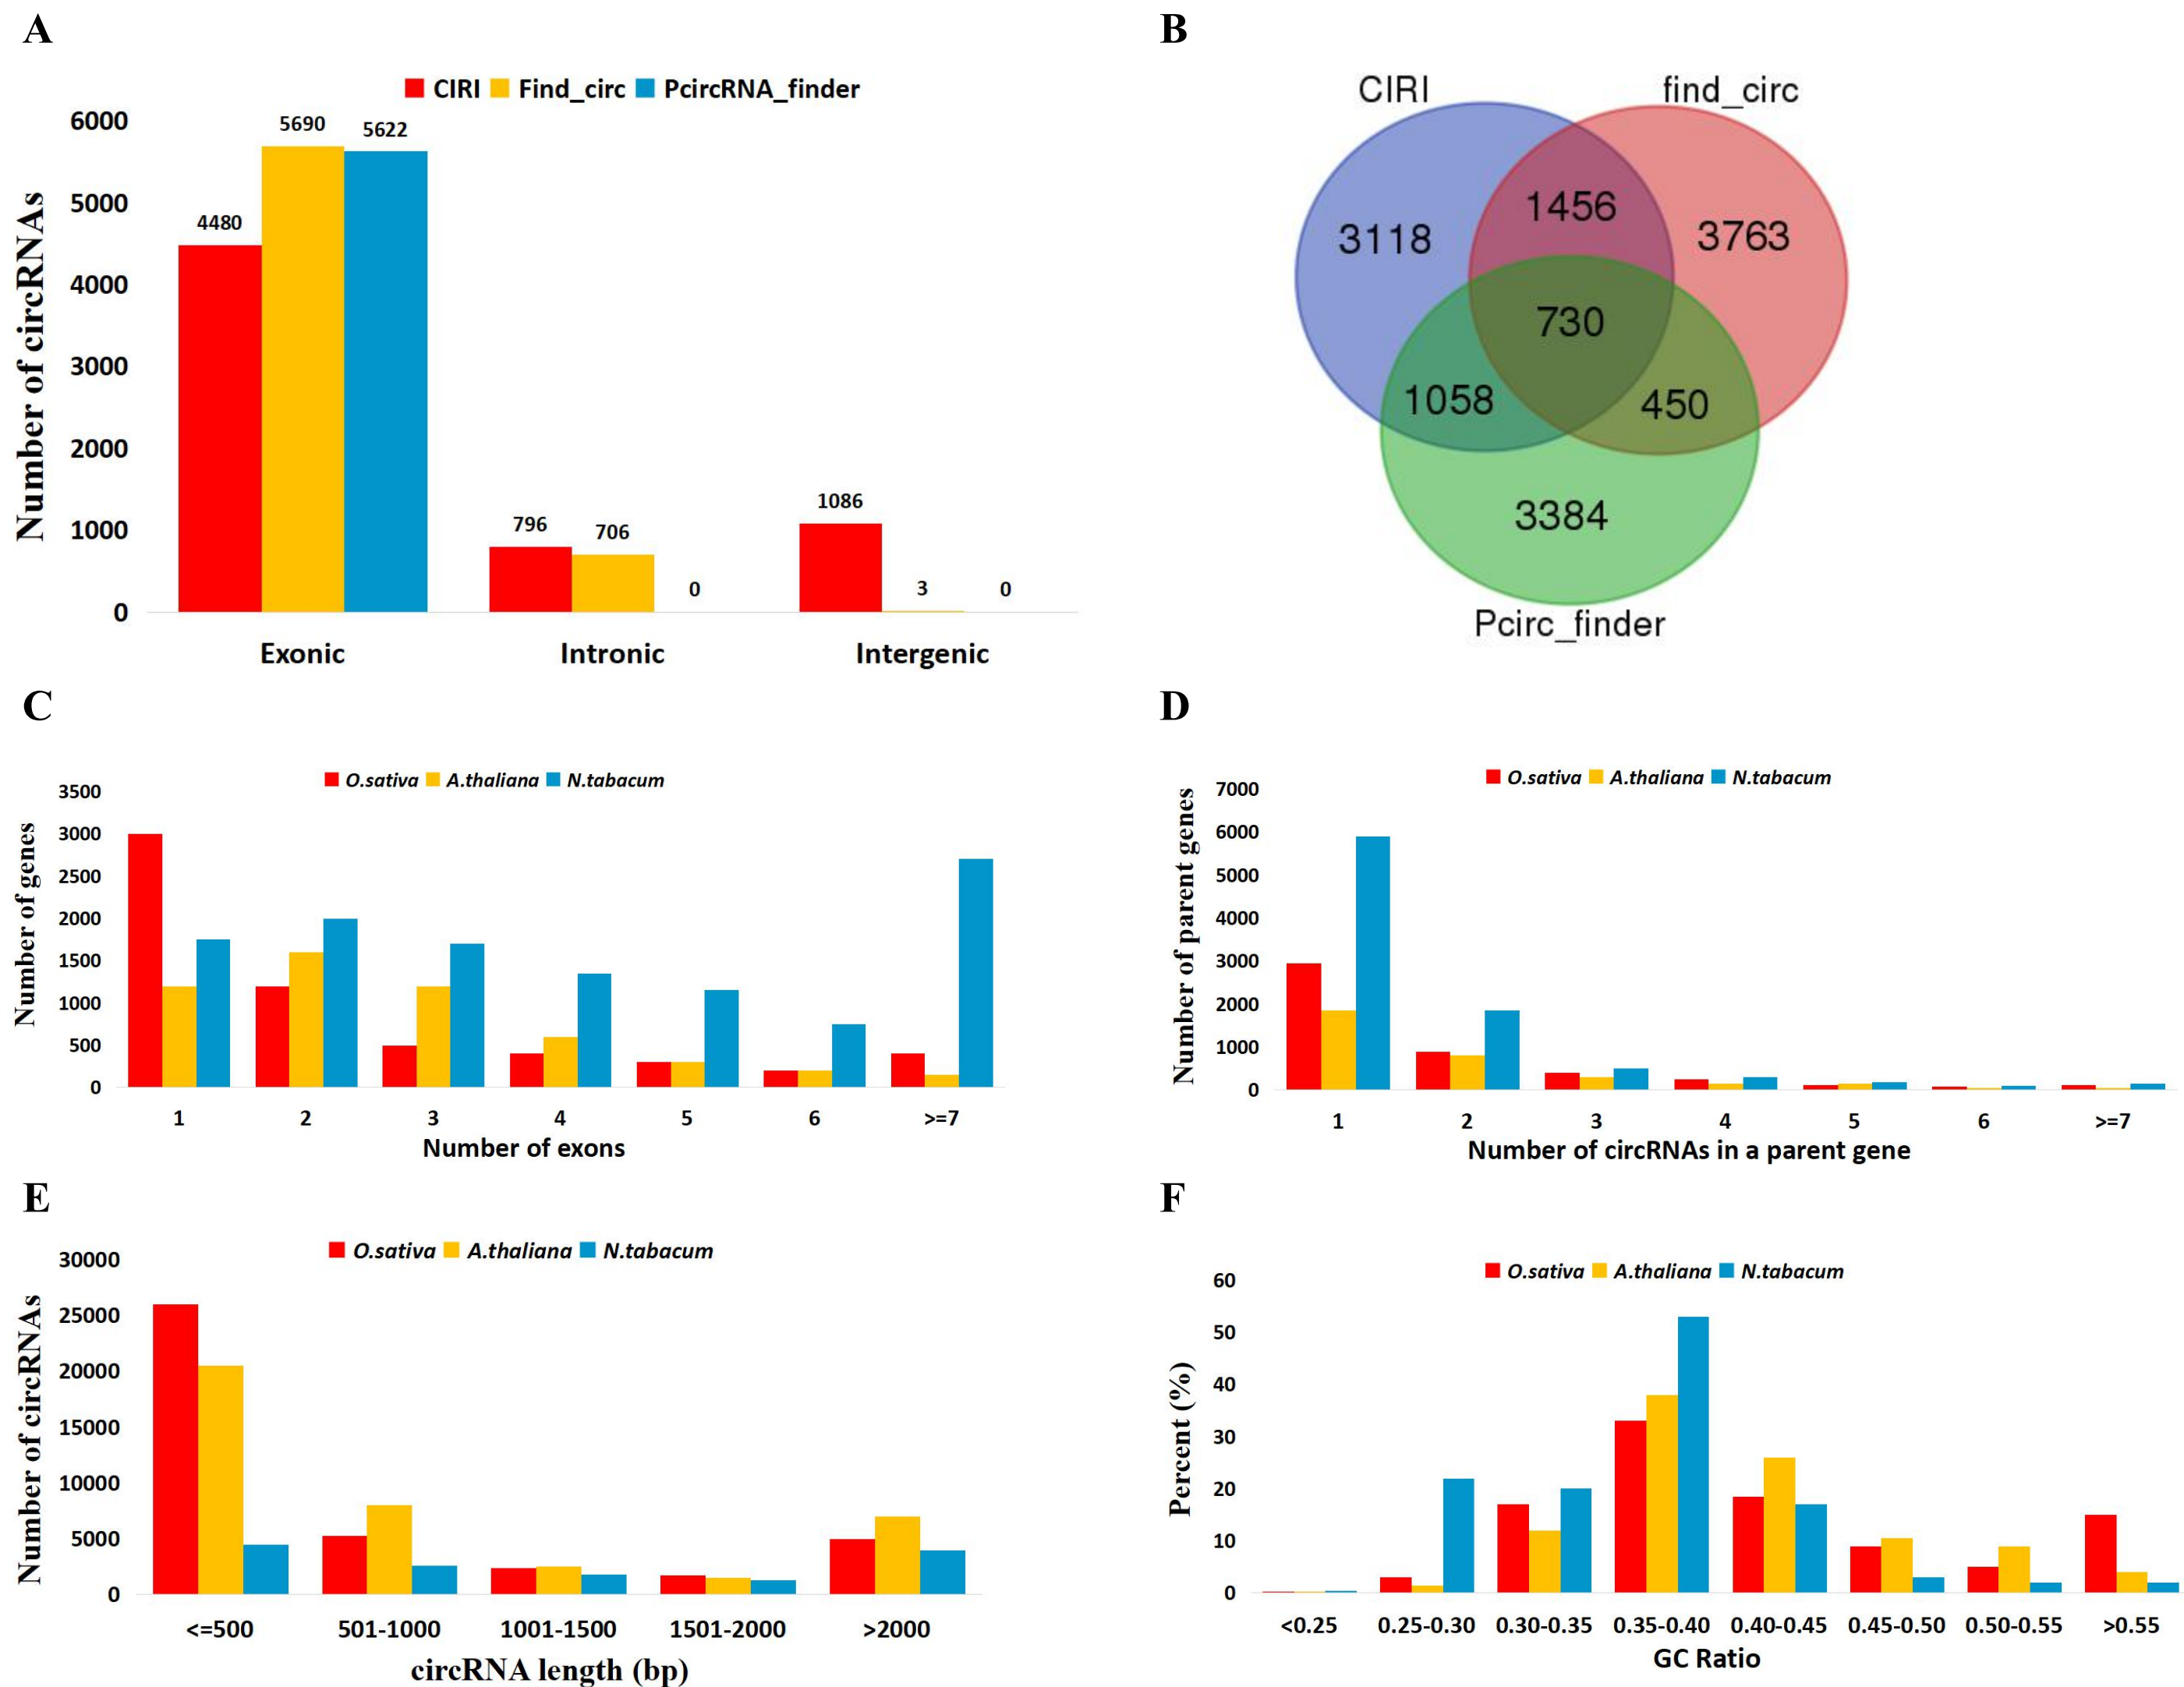

**Fig. S3. Genome-wide identification of circRNAs in tobacco.** (A) Number of different types of circRNAs identified in this study. (B) Number of circRNAs identified by different methods in tobacco. (C) Number of exonic circRNAs that contained different number of exons derived from parental genes in plants. (D) Number of parent genes that generated different number of circRNAs in plants. (E) Distribution of length of circRNAs in plants. (F) Distribution of GC ratio of circRNAs in plants.
