# Supplementary material for: A transcriptomic profile of topping responsive non-coding RNAs in tobacco roots (Nicotiana tabacum)
Source: PubMed Central journal article supplement (PMC6854694; doi:10.1186/s12864-019-6236-6), 2019-11-14
Supplement: 12864_2019_6236_MOESM4_ESM.pdf [file 12864_2019_6236_MOESM4_ESM.pdf]

**A**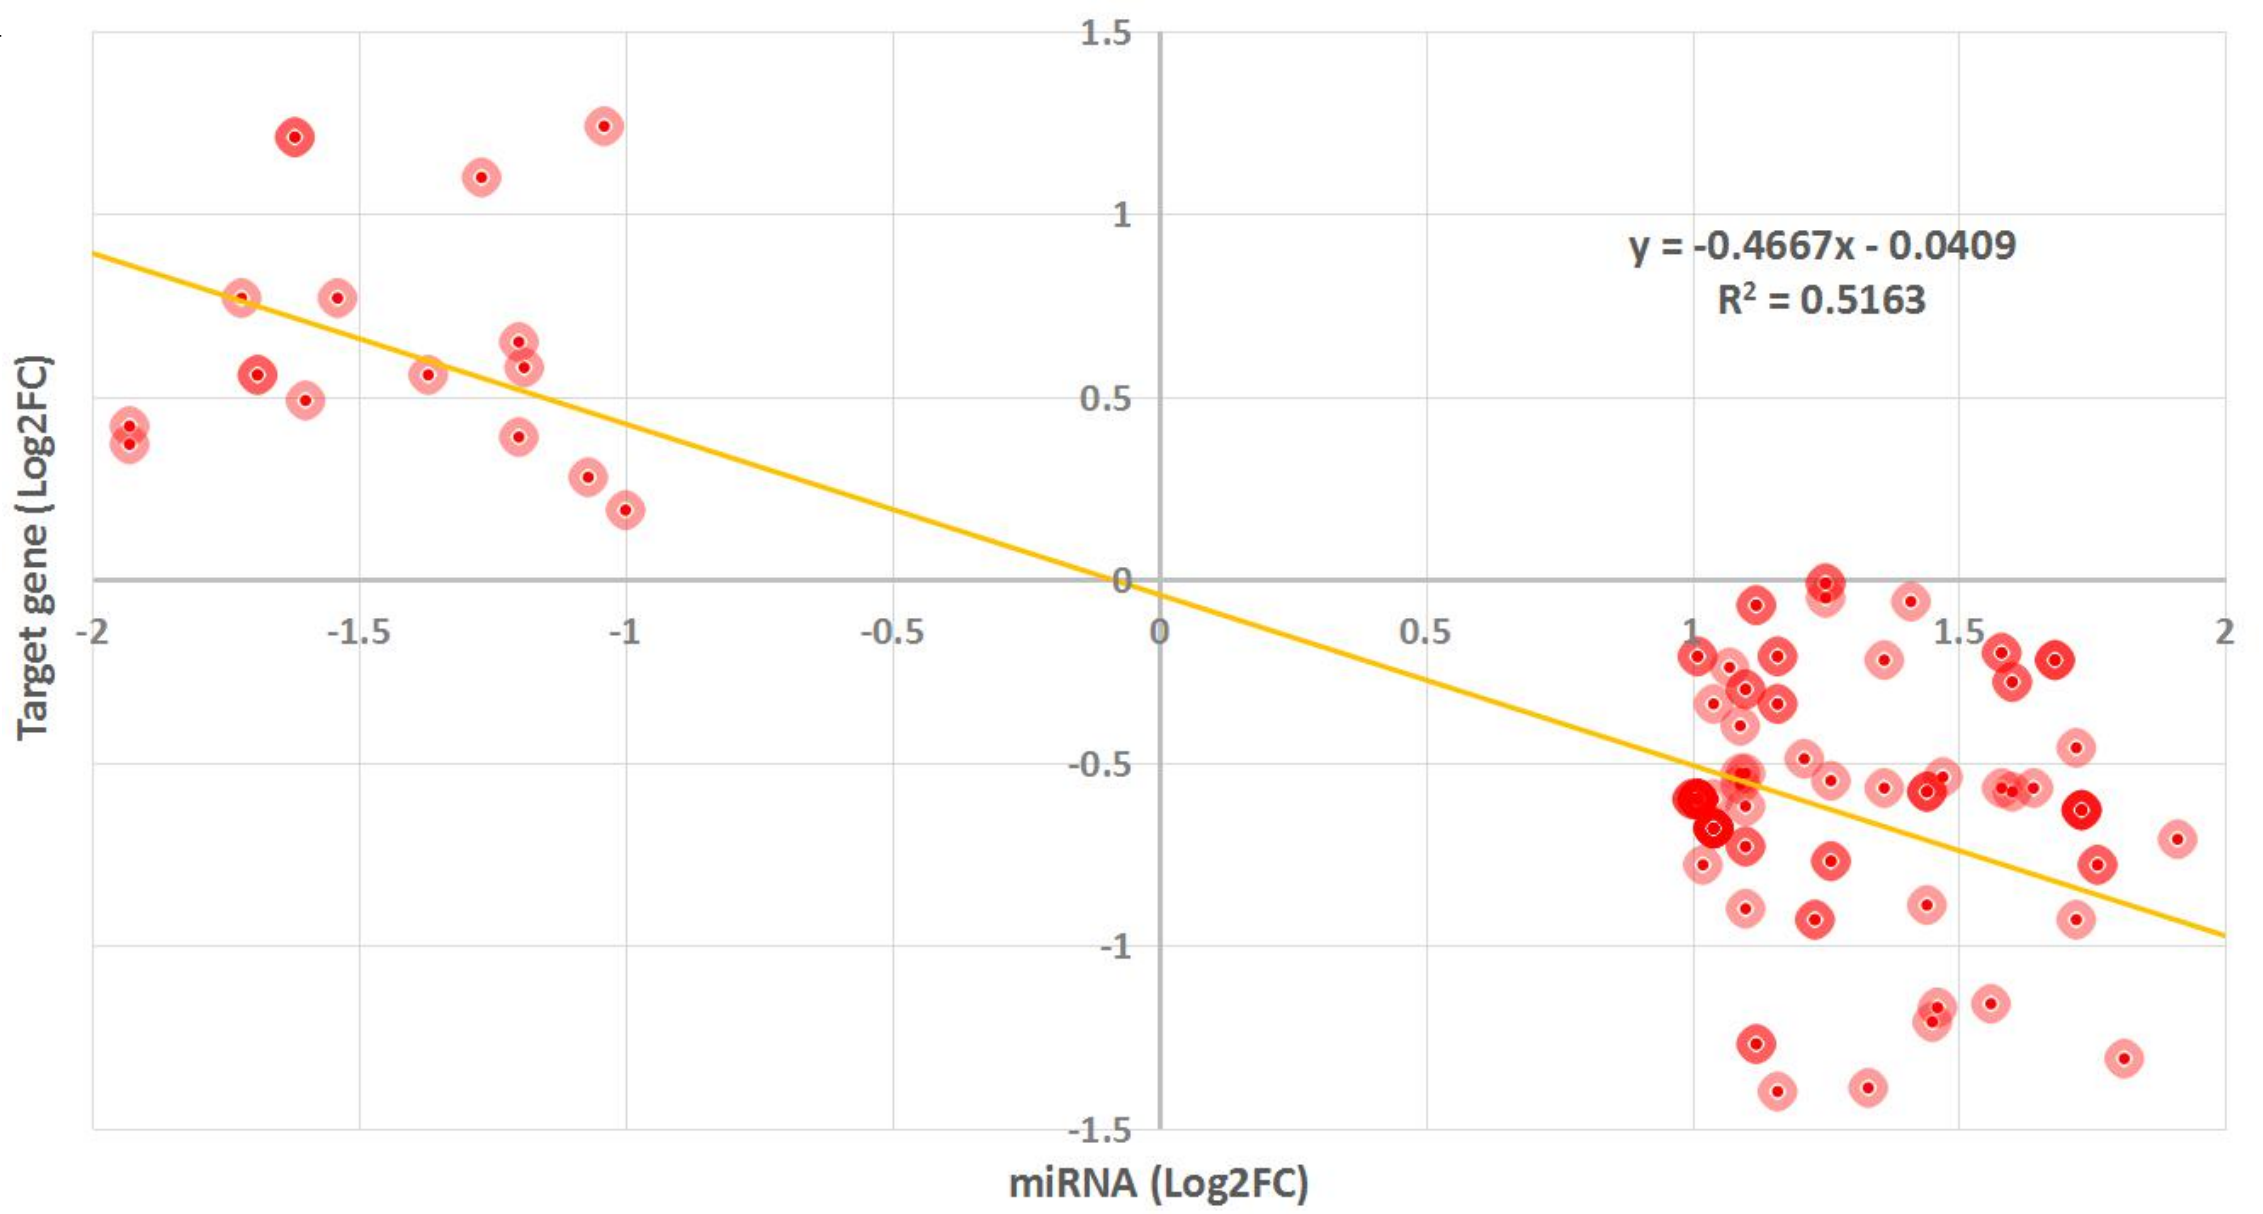**B**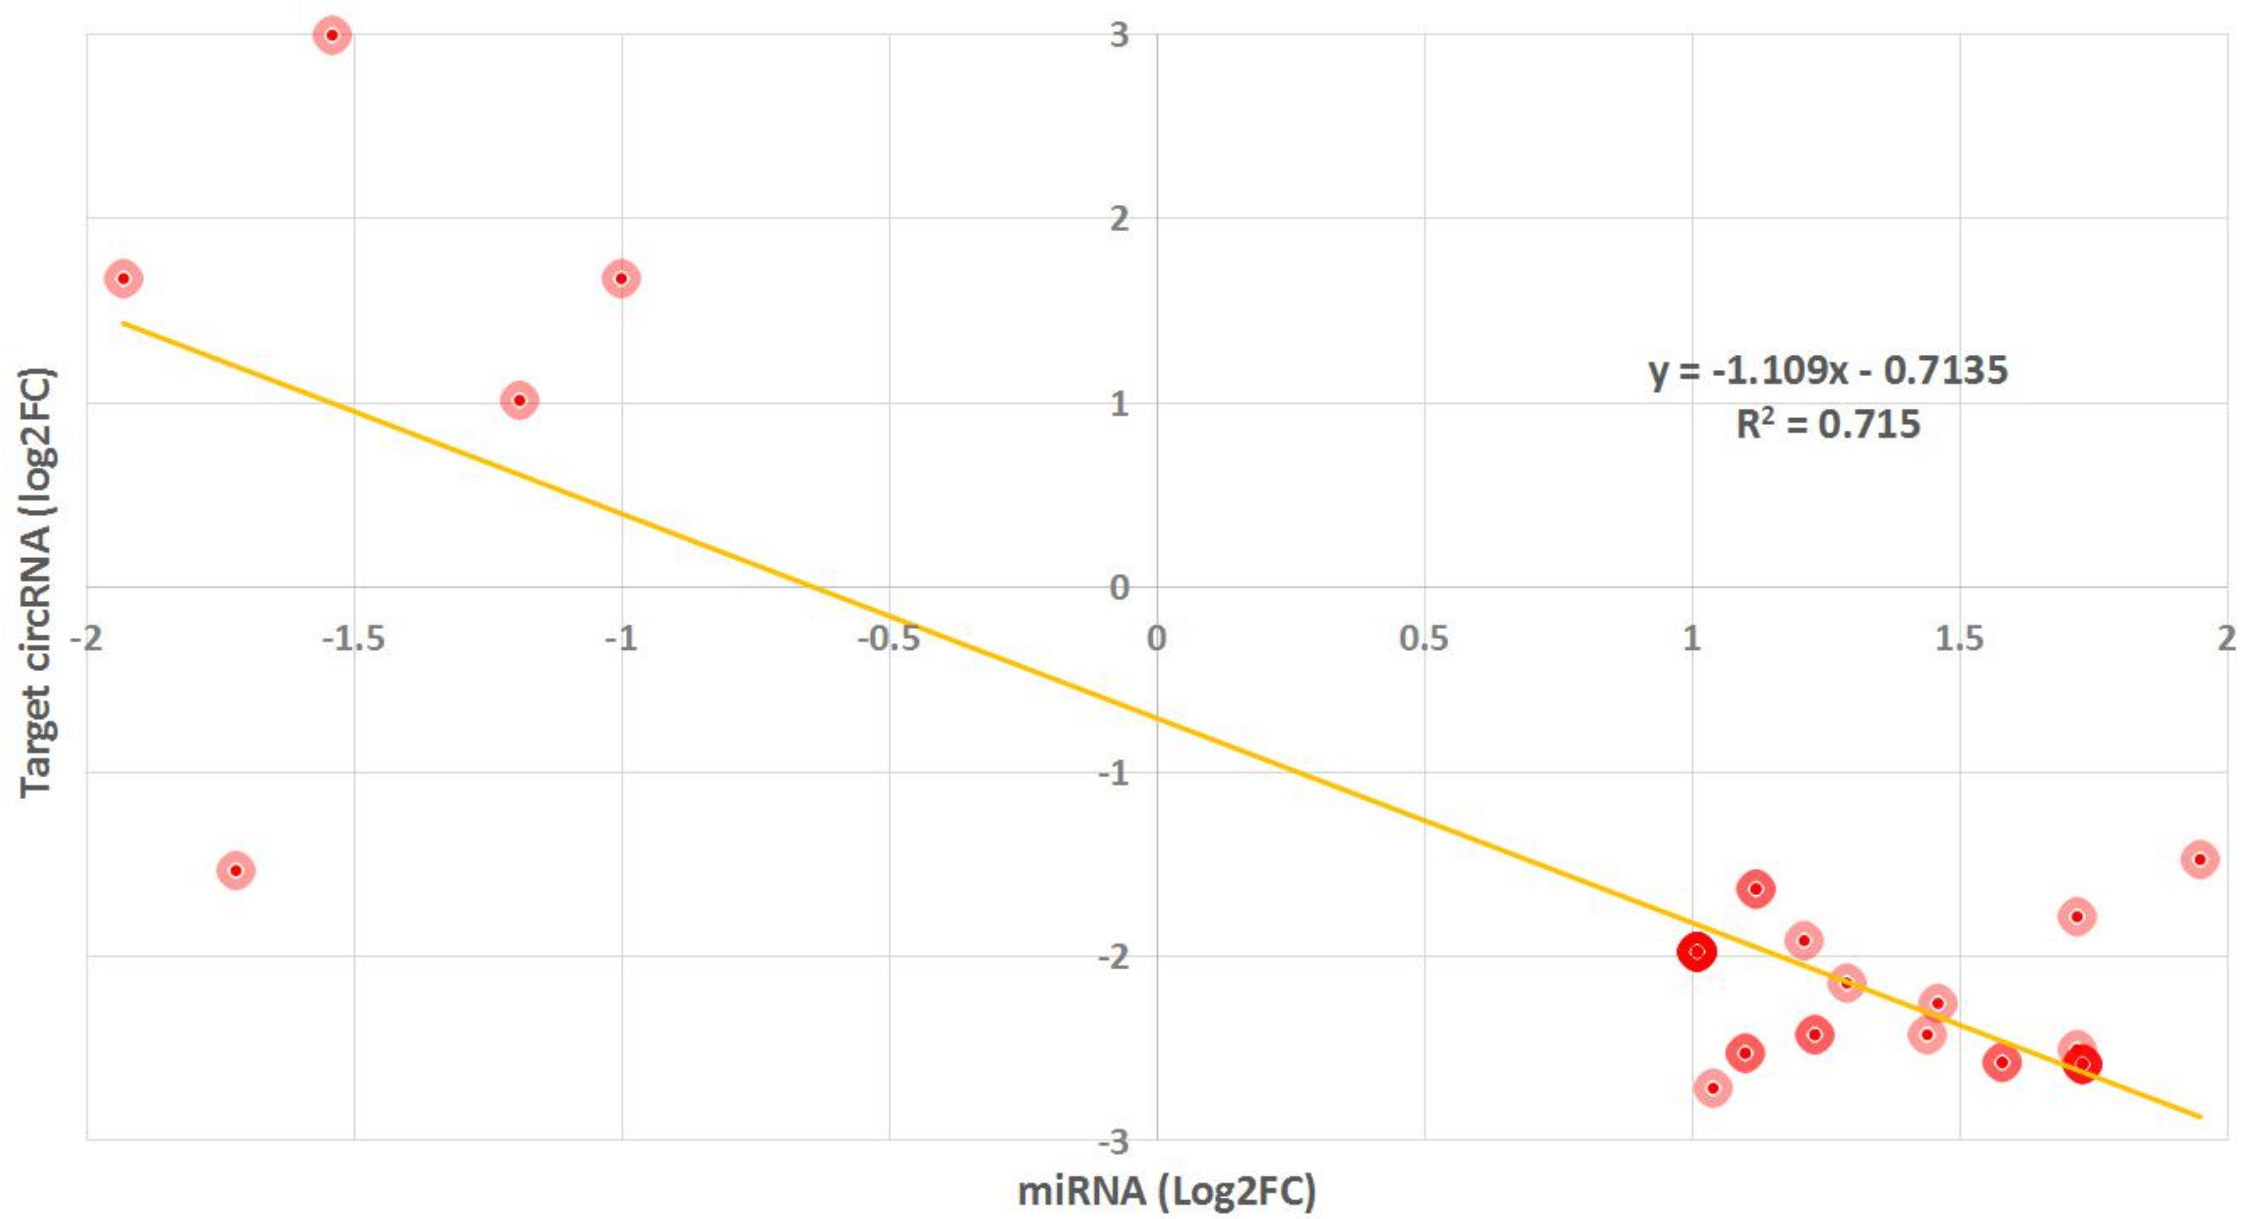**C**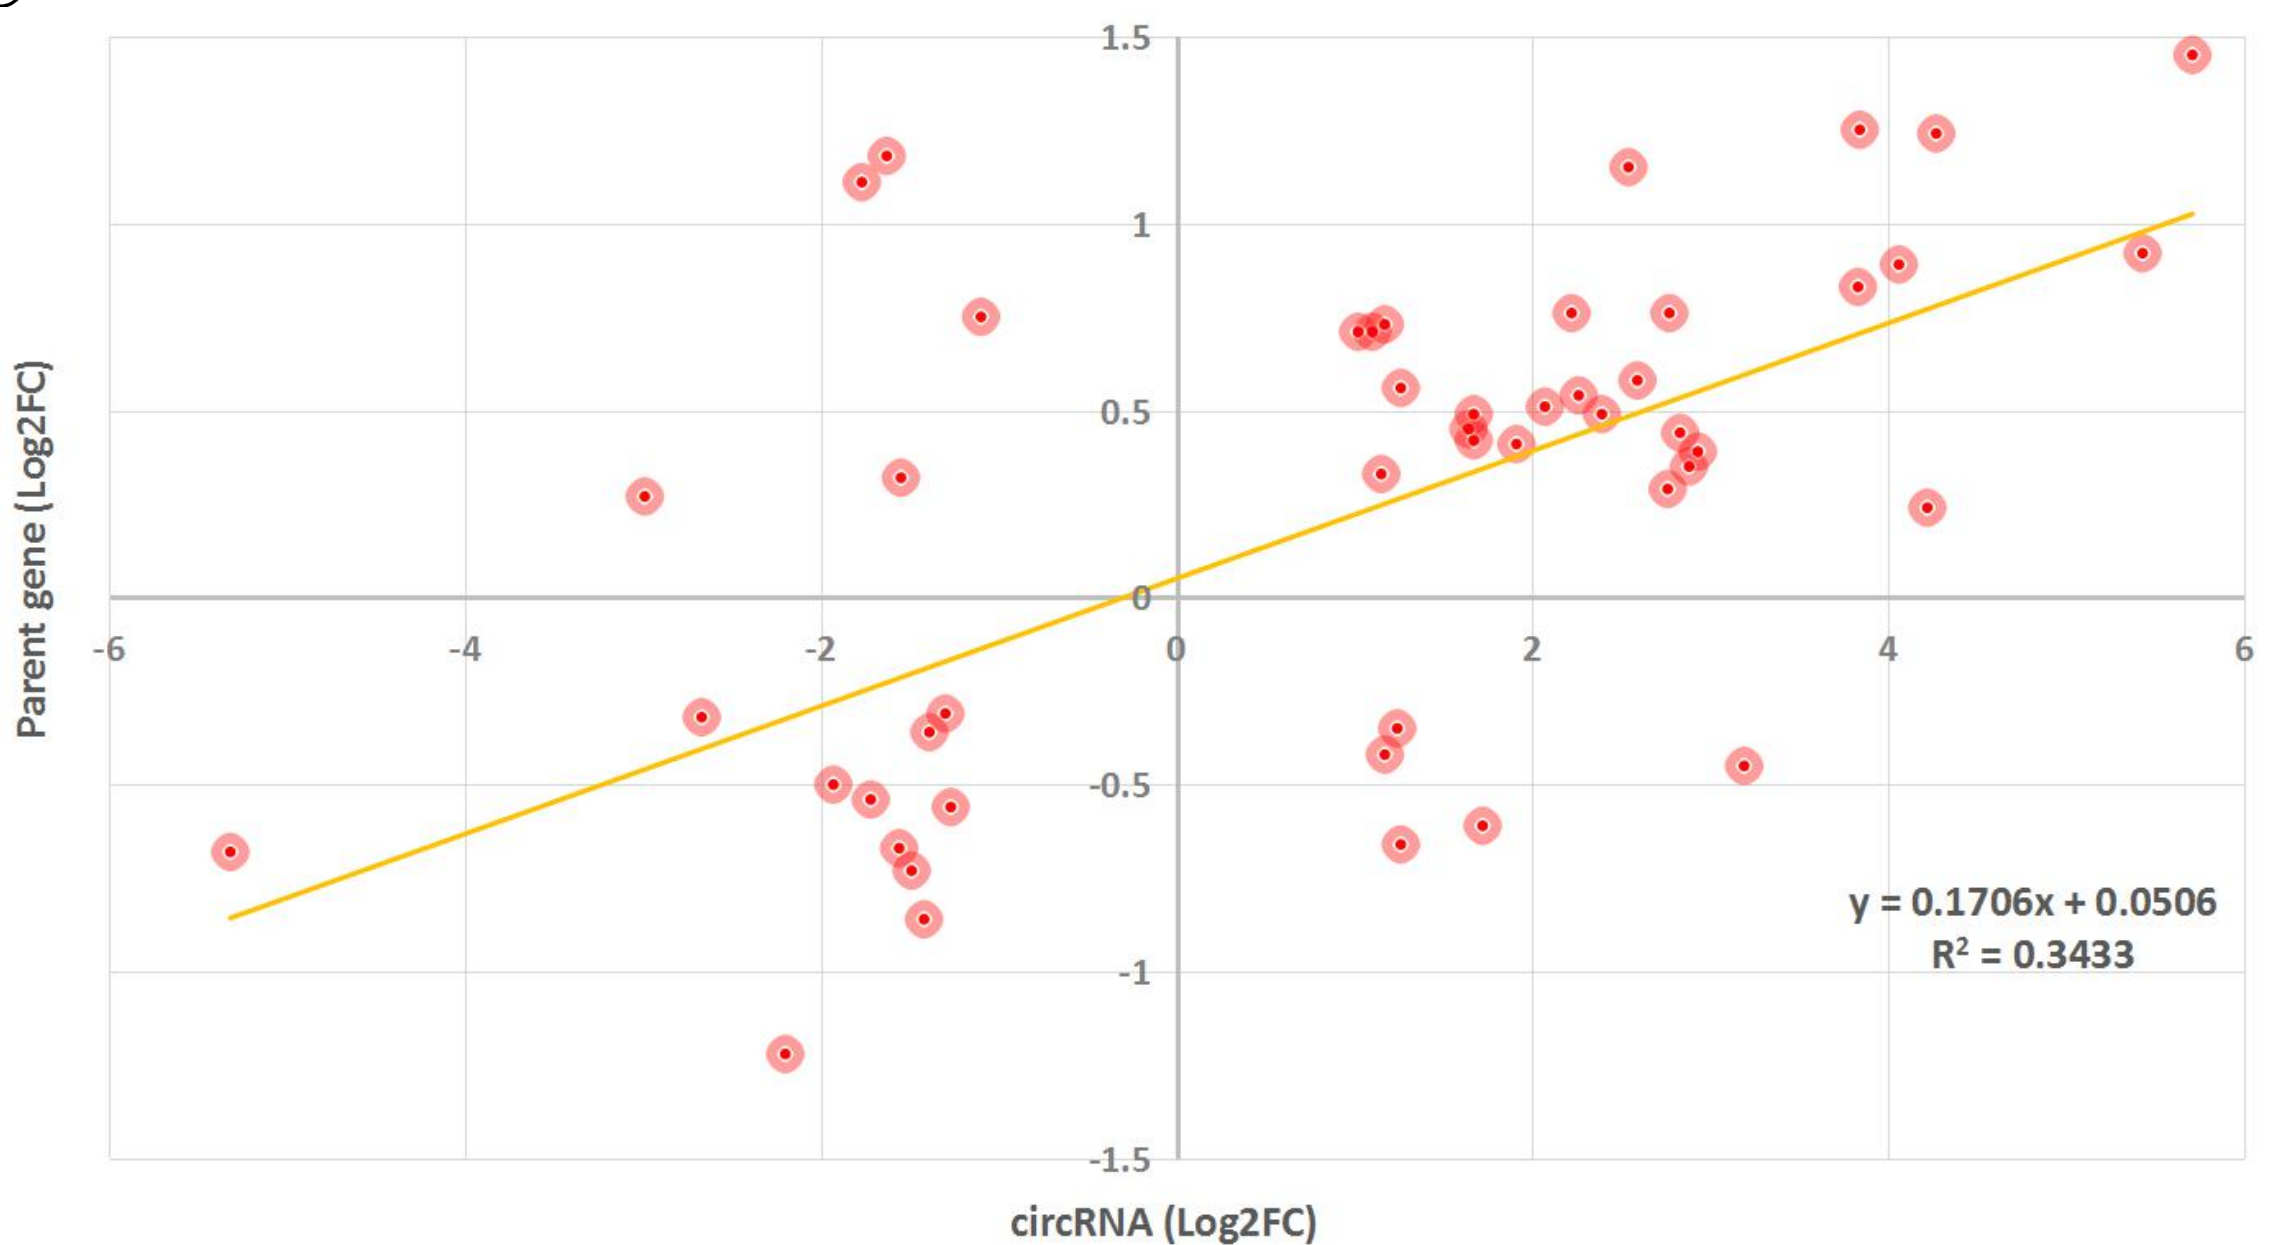

**Fig. S4. Co-expression patterns of coding RNAs and three type of non-coding RNAs.** (A) Equation of linear regression of fold-changes on log<sub>2</sub>-scale of the miRNAs ( $|\log_2FC| \geq 1$ ) and their target genes. (B) Equation of linear regression of fold-changes on log<sub>2</sub>-scale of the miRNAs ( $|\log_2FC| \geq 1$ ) and their target exonic-circRNAs ( $|\log_2FC| \geq 1$ ). (C) Equation of linear regression of fold-changes on log<sub>2</sub>-scale of the circRNAs ( $|\log_2FC| \geq 1$ ) and their host genes (FDR < 0.05).
